# Supplementary material
Source: PubMed Central journal article supplement (PMC3003049)
Supplement: 1015819107_pnas.1015819107_SI.pdf [file 1015819107_pnas.1015819107_SI.pdf]

# Supporting Information

Sugita et al. 10.1073/pnas.1015819107

## SI Materials and Methods

**Computational details.** All-atom MD simulations of sarcoplasmic reticulum (SR)  $\text{Ca}^{2+}$ -ATPase with bound  $\text{Ca}^{2+}$ , explicit solvent, and phospholipids were carried out using MARBLE software package (1). CHARMM27 force field parameters for proteins (2), phospholipids, and ions, except for  $\text{Ca}^{2+}$  were used. TIP3P model (3) was used for water molecules. The Lennard–Jones parameters for  $\text{Ca}^{2+}$  were taken from the ion parameters developed by Åqvist (4), because the hydration free energies for a series of divalent cations have been reproduced with the parameter sets. Periodic boundary conditions with no truncation using the particle mesh Ewald (PME) algorithm were employed (5, 6). The Lennard–Jones interactions were switched to zero over a range of 8–10 Å using an atom-based cut-off. All water molecules and all  $\text{CH}_x$ ,  $\text{NH}_x$ , ( $x = 1, 2, 3$ ), SH, and OH groups in the protein and lipids were treated as rigid-bodies (1). The equation of motion was integrated with a time step of 2 fs. In the MD simulations, pressure and temperature of the simulation system were controlled to 1 atm and 300 K by using the constant area-isothermal isobaric (NPAT) algorithm (7).

The starting structures for wild-type  $\text{Ca}^{2+}$ -ATPase bound with two  $\text{Ca}^{2+}$  were taken from a crystal structure of the enzyme [Protein Data Bank (PDB) ID: 1su4] (8). Glu58 and Glu908 were treated as protonated (9). The starting structures for Glu771Gln or Glu908Gln were made by substituting the Glu in the wild-type structure with Gln keeping the side chain conformation unchanged. In Glu771Gln, the ionization states of the glutamates were the same as those in wild-type; only Glu58 was treated as protonated in Glu908Gln. Detailed procedures for setting up a full simulation system including a  $\text{Ca}^{2+}$ -ATPase, 473 dioleoylphosphatidylcholine phospholipids, two bound  $\text{Ca}^{2+}$ , 150 mM salt solution were described previously (9). After 1-ns equilibration, we performed three 10-ns molecular dynamics (MD) simulations for wild-type (WT1, WT2, and WT3), Glu771Gln (E771Q1, E771Q2, and E771Q3), and Glu908Gln (E908Q1, E908Q2, and E908Q3). All the coordinates of the simulation system were saved every 1 ps during production dynamics. For structural comparison,  $\alpha$  atoms of the residues on the M7–M10 helices were fitted to those in the crystal structure.

1. Ikeguchi M (2004) Partial rigid-body dynamics in NPT, NPAT, and NPγT ensembles for proteins and membranes. *J Comput Chem* 25:529–541.
2. Mackerell AD, et al. (1998) All-atom empirical potential for molecular modeling and dynamics studies of proteins. *J Phys Chem B* 102:3586–3616.
3. Jorgensen WL, Chandrasekhara J, Madura JD, Impey RW, Klein ML (1983) Comparison of simple potential functions for simulating liquid water. *J Chem Phys* 79:926–935.
4. Åqvist J (1990) Ion–water interaction potentials derived from free-energy perturbation simulations. *J Phys Chem* 94:8021–8024.
5. Darden T, York D, Pedersen L (1993) Particle mesh Ewald: An  $N \oplus \log(N)$  method for Ewald sums in large systems. *J Chem Phys* 98:10089–10092.
6. Essmann U, et al. (1995) A smooth particle mesh ewald method. *J Chem Phys* 103:8577–8593.
7. Zhang Y, Feller SE, Brooks B, Pastor RW (1995) Computer simulation of liquid/liquid interfaces. I. Theory and application to octane/water. *J Chem Phys* 103:10252–10266.
8. Toyoshima C, Nakasako M, Nomura H, Ogawa H (2000) Crystal structure of the calcium pump of sarcoplasmic reticulum at 2.6 Å resolution. *Nature* 405:647–655.
9. Sugita Y, Miyashita N, Ikeguchi M, Kidera A, Toyoshima C (2005) Protonation of the acidic residues in the transmembrane cation-binding sites of the  $\text{Ca}^{2+}$  pump. *J Am Chem Soc* 127:6150–6151.

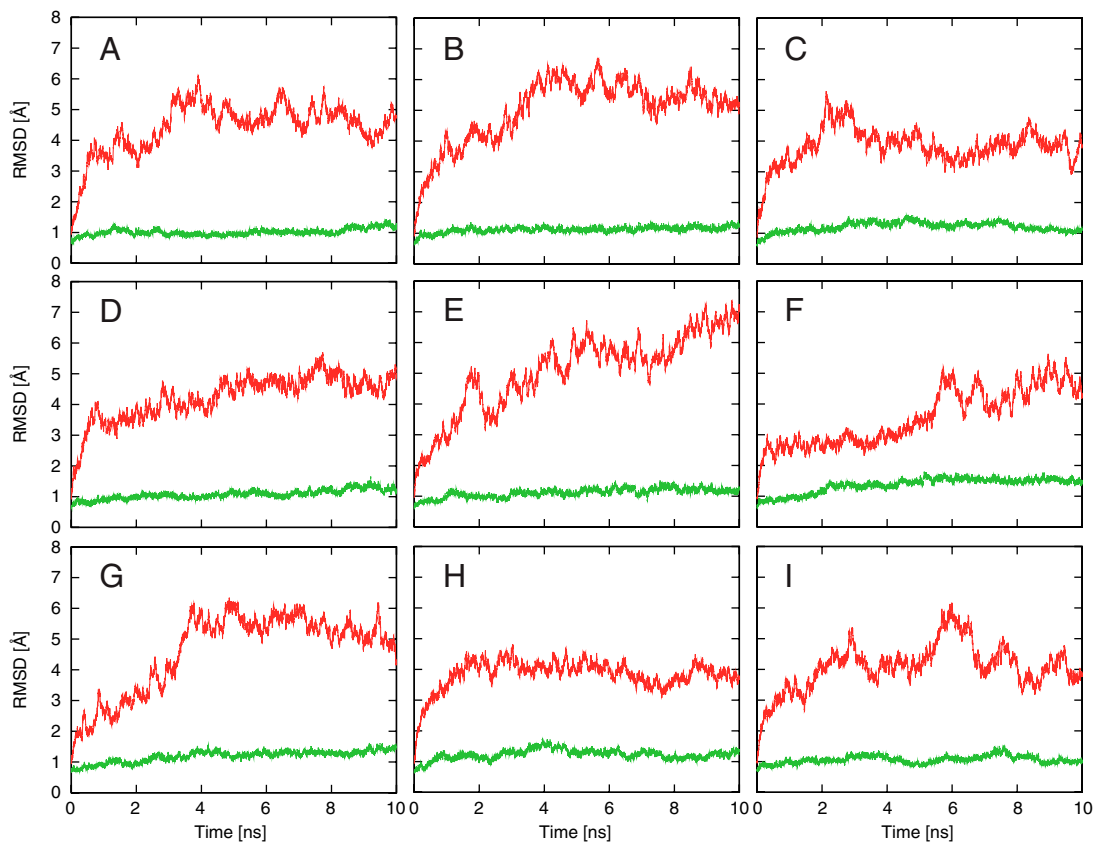

**Fig. S1.** The root mean square deviations (RMSD) of  $\text{Ca}$  atoms from the crystal structure (PDB ID: 1SU4). The RMSD for the simulations of wild-type [(A) WT1, (B) WT2, and (C) WT3], for those of the Glu771Gln mutant [(D) E771Q1, (E) E771Q2, and (F) E771Q3], and for those of the Glu908Gln mutant [(G) E908Q1, (H) E908Q2, and (I) E908Q3]. Red and green lines represent the RMSD calculated for a full structure and the transmembrane helices of the  $\text{Ca}^{2+}$ -ATPase, respectively.



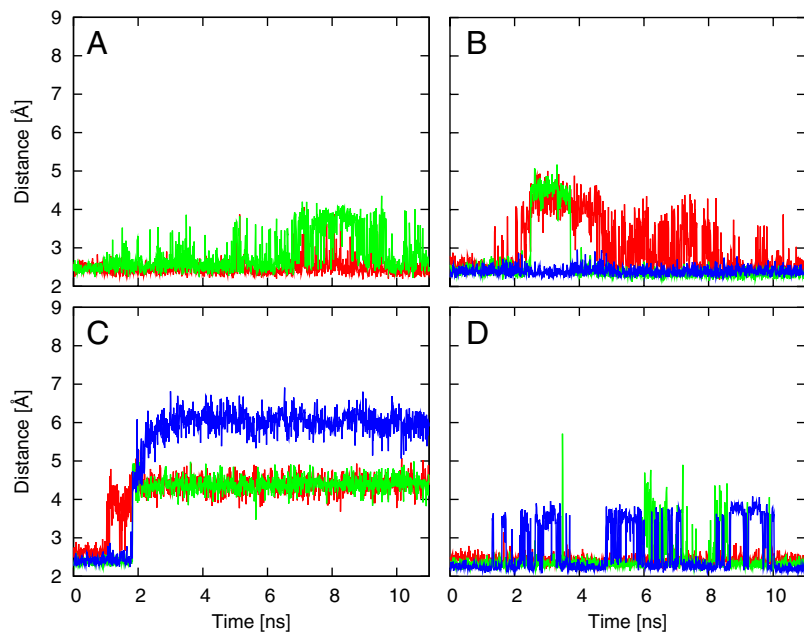

**Fig. 53.** Time-series of the  $\text{Ca}^{2+}$ -binding distances. (A) The distances between site II  $\text{Ca}^{2+}$  and the Ala305 carbonyl (red), and between site I  $\text{Ca}^{2+}$  and the Glu908 carboxyl (green) in a simulation for wild-type (WT1). (B) Those between site II  $\text{Ca}^{2+}$  and the Ala305 carbonyl (red), between site I  $\text{Ca}^{2+}$  and the Gln771 carbonyl (green), and between the site I  $\text{Ca}^{2+}$  and Glu908 (blue) in a simulation for the Glu771Gln mutant (E771Q1). (C) Those between site II  $\text{Ca}^{2+}$  and the Ala305 carbonyl (red), between site I  $\text{Ca}^{2+}$  and the Thr799 hydroxyl (green), between site I  $\text{Ca}^{2+}$  and the Glu908 carboxyl (blue) in a simulation for the Glu771Gln mutant (E771Q3). (D) Those between the site II  $\text{Ca}^{2+}$  and the Ala305 carbonyl (red), between site I  $\text{Ca}^{2+}$  and the Asn768 carbonyl (green), between the site I  $\text{Ca}^{2+}$  and Glu771 carboxyl (blue) in a simulation for the Glu908Gln mutant (E908Q1).





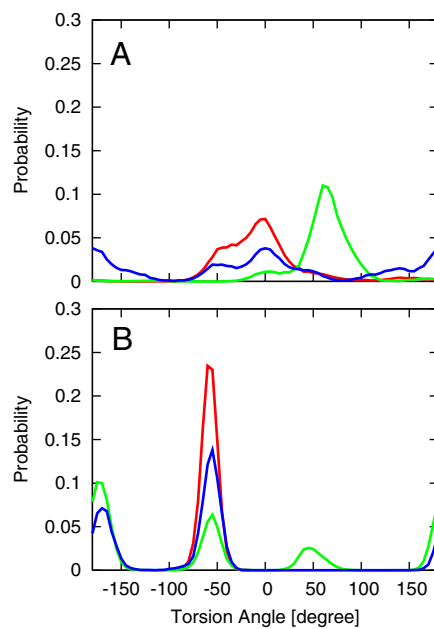

**Fig. S6.** Distributions of the side chain torsion angles  $\chi_3$  in Glu771(Gln771) (A) and  $\chi_1$  in Ile775 (B). In each figure, red, green, blue lines represent the distributions calculated from the three simulation trajectories for wild-type, Glu771Gln, and Glu908Gln mutants, respectively.





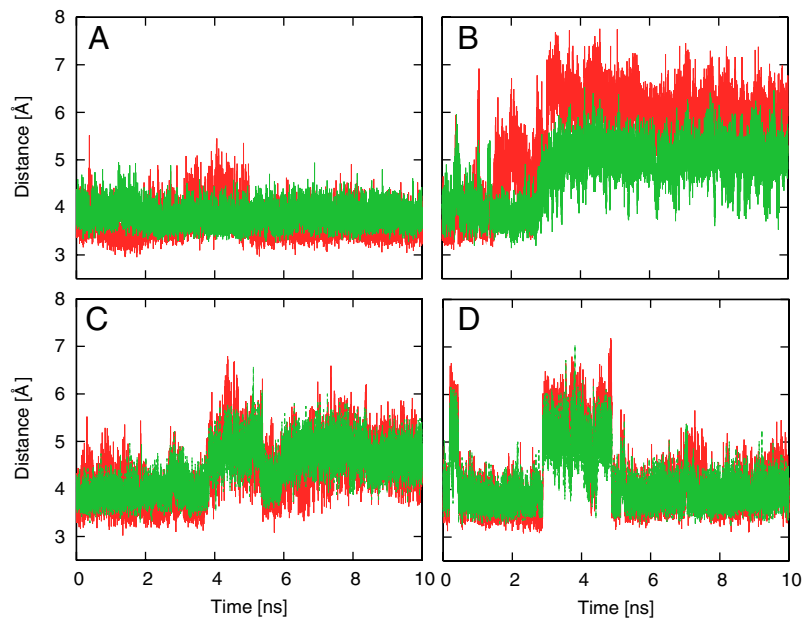

**Fig. S8.** Time-series of distances from the Ile775 side chain to Glu771 and Leu302. The distances are defined from the Ile775 C $\gamma$ 1 to the Glu771 carbonyl oxygen (red), and the Leu302 C $\delta$  (green). (A) A simulation for wild-type (WT1), (B) a simulation for the Glu771Gln mutant (E771Q1), (C) a simulation for the Glu771Gln mutant (E771Q3), and (D) a simulation for the Glu908Gln mutant (E908Q1).
